# Supplementary figures and images for: Tunable electronic and optical properties of a type-II AlAs/GaS heterojunction: first-principles calculations
Source: Royal Society of Chemistry journal article supplement (doi:10.1039/d3ce00255a), 2023-01-01

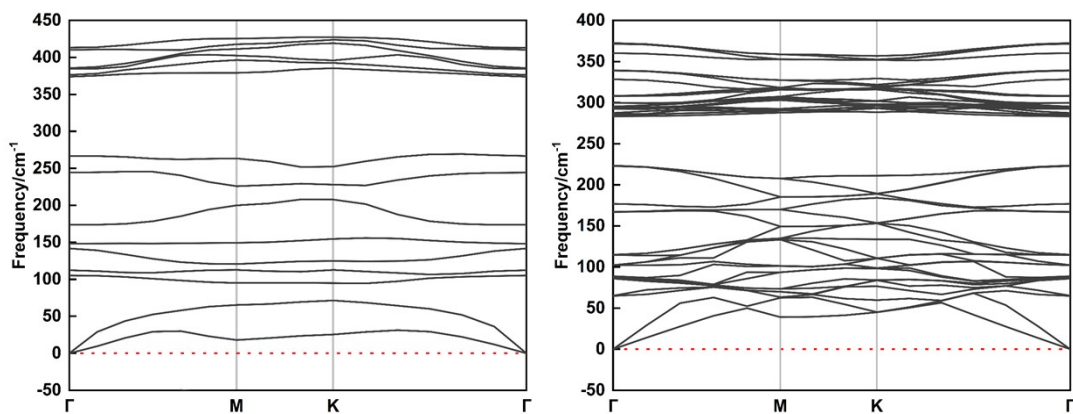

Figure S1 (a) phonon spectrum of AlAs monolayer, (b) phonon spectrum of GaS monolayer.

Supplement: d3ce00255a1.pdf [file d3ce00255a1.pdf]
